# Supplementary material for: Plant-Pathogen Interaction, Circadian Rhythm, and Hormone-Related Gene Expression Provide Indicators of Phytoplasma Infection in Paulownia fortunei
Source: MDPI journal article supplement (doi:10.3390/ijms151223141), 2014-12-12
Supplement: s1 [file s1]

# Supplementary Information

**Figure S1.** Distribution of all-unigene lengths in the transcriptome of *P. fortunei*.

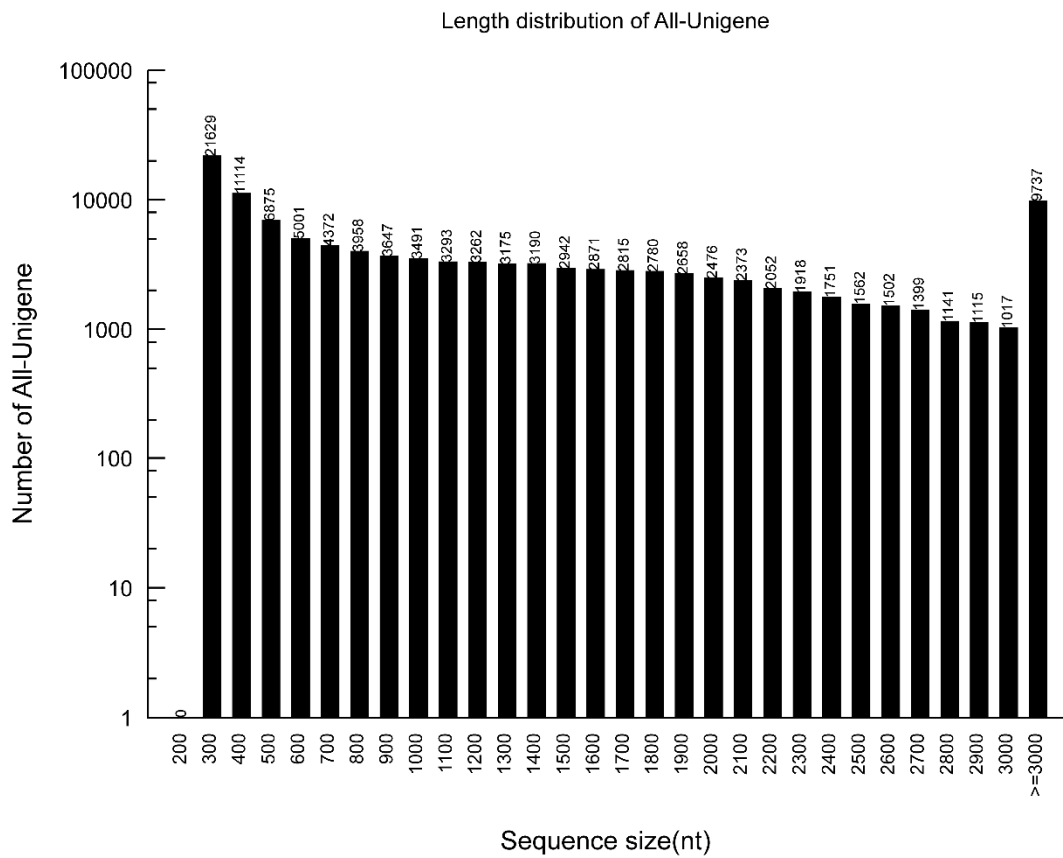

**Figure S2.** Gene ontology (GO) classification of the *P. fortunei* DEGs. Final DEGs were annotated and categorized into 48 function groups.

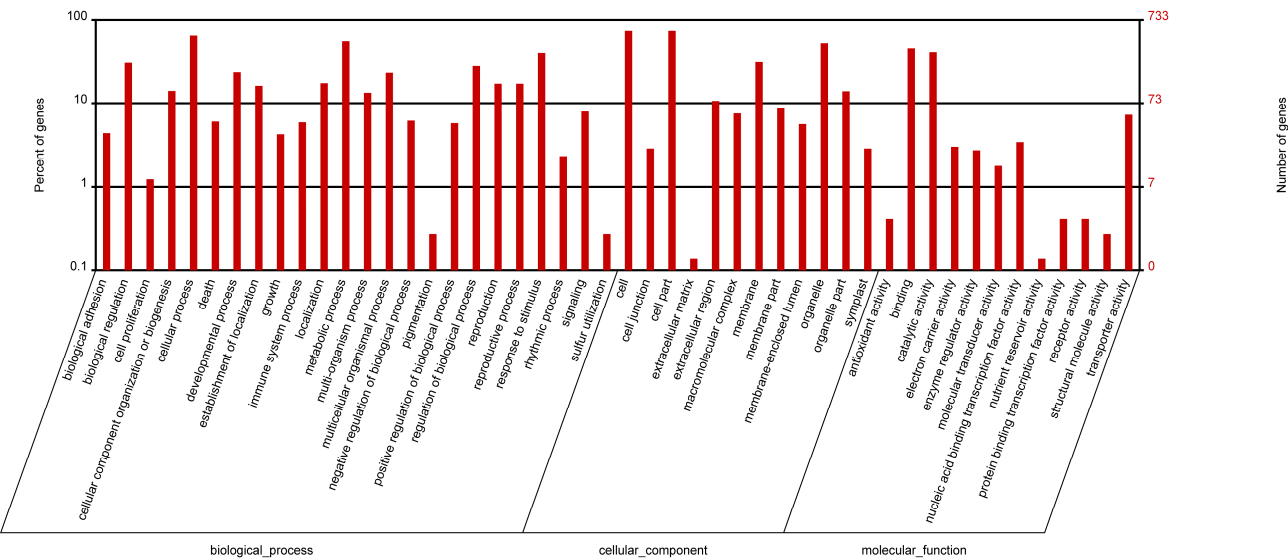

**Table S1.** KEGG pathway analysis results for the *P. fortunei* all-unigenes.

| #  | Pathway                                               | Count (46,381) | Pathway ID |
|----|-------------------------------------------------------|----------------|------------|
| 1  | Metabolic pathways                                    | 10,325         | ko01100    |
| 2  | Biosynthesis of secondary metabolites                 | 4713           | ko01110    |
| 3  | Plant-pathogen interaction                            | 2734           | ko04626    |
| 4  | Plant hormone signal transduction                     | 2418           | ko04075    |
| 5  | Spliceosome                                           | 1754           | ko03040    |
| 6  | RNA transport                                         | 1561           | ko03013    |
| 7  | Glycerophospholipid metabolism                        | 1405           | ko00564    |
| 8  | Protein processing in endoplasmic reticulum           | 1350           | ko04141    |
| 9  | Endocytosis                                           | 1332           | ko04144    |
| 10 | Starch and sucrose metabolism                         | 1242           | ko00500    |
| 11 | Ether lipid metabolism                                | 996            | ko00565    |
| 12 | mRNA surveillance pathway                             | 965            | ko03015    |
| 13 | Ubiquitin mediated proteolysis                        | 913            | ko04120    |
| 14 | Purine metabolism                                     | 900            | ko00230    |
| 15 | RNA degradation                                       | 806            | ko03018    |
| 16 | Pyrimidine metabolism                                 | 772            | ko00240    |
| 17 | Ribosome                                              | 743            | ko03010    |
| 18 | Ribosome biogenesis in eukaryotes                     | 703            | ko03008    |
| 19 | Phenylpropanoid biosynthesis                          | 662            | ko00940    |
| 20 | ABC transporters                                      | 601            | ko02010    |
| 21 | Circadian rhythm - plant                              | 549            | ko04712    |
| 22 | Glycolysis / Gluconeogenesis                          | 519            | ko00010    |
| 23 | Amino sugar and nucleotide sugar metabolism           | 517            | ko00520    |
| 24 | Galactose metabolism                                  | 500            | ko00052    |
| 25 | Phosphatidylinositol signaling system                 | 472            | ko04070    |
| 26 | Pentose and glucuronate interconversions              | 469            | ko00040    |
| 27 | Peroxisome                                            | 427            | ko04146    |
| 28 | Oxidative phosphorylation                             | 424            | ko00190    |
| 29 | Aminoacyl-tRNA biosynthesis                           | 383            | ko00970    |
| 30 | RNA polymerase                                        | 382            | ko03020    |
| 31 | Basal transcription factors                           | 364            | ko03022    |
| 32 | Other glycan degradation                              | 363            | ko00511    |
| 33 | Pyruvate metabolism                                   | 360            | ko00620    |
| 34 | Inositol phosphate metabolism                         | 359            | ko00562    |
| 35 | Nucleotide excision repair                            | 358            | ko03420    |
| 36 | Flavonoid biosynthesis                                | 356            | ko00941    |
| 37 | Homologous recombination                              | 348            | ko03440    |
| 38 | Carotenoid biosynthesis                               | 345            | ko00906    |
| 39 | Cyanoamino acid metabolism                            | 332            | ko00460    |
| 40 | Phagosome                                             | 326            | ko04145    |
| 41 | Porphyrin and chlorophyll metabolism                  | 324            | ko00860    |
| 42 | Stilbenoid, diarylheptanoid and gingerol biosynthesis | 322            | ko00945    |
| 43 | Arginine and proline metabolism                       | 321            | ko00330    |

**Table S1. Cont.**

| #  | Pathway                                               | Count (46,381) | Pathway ID |
|----|-------------------------------------------------------|----------------|------------|
| 44 | N-Glycan biosynthesis                                 | 315            | ko00510    |
| 45 | Valine, leucine and isoleucine degradation            | 313            | ko00280    |
| 46 | Glutathione metabolism                                | 312            | ko00480    |
| 47 | Glycosylphosphatidylinositol(GPI)-anchor biosynthesis | 305            | ko00563    |
| 48 | Terpenoid backbone biosynthesis                       | 304            | ko00900    |
| 49 | Zeatin biosynthesis                                   | 301            | ko00908    |
| 50 | Glycerolipid metabolism                               | 294            | ko00561    |
| 51 | Regulation of autophagy                               | 290            | ko04140    |
| 52 | Sphingolipid metabolism                               | 288            | ko00600    |
| 53 | Ascorbate and aldarate metabolism                     | 287            | ko00053    |
| 54 | Pentose phosphate pathway                             | 285            | ko00030    |
| 55 | Natural killer cell mediated cytotoxicity             | 278            | ko04650    |
| 56 | Fatty acid metabolism                                 | 276            | ko00071    |
| 57 | Cysteine and methionine metabolism                    | 274            | ko00270    |
| 58 | Glycine, serine and threonine metabolism              | 265            | ko00260    |
| 59 | Limonene and pinene degradation                       | 248            | ko00903    |
| 60 | Fructose and mannose metabolism                       | 247            | ko00051    |
| 61 | Carbon fixation in photosynthetic organisms           | 245            | ko00710    |
| 62 | Glycosaminoglycan degradation                         | 241            | ko00531    |
| 63 | Tyrosine metabolism                                   | 237            | ko00350    |
| 64 | alpha-Linolenic acid metabolism                       | 232            | ko00592    |
| 65 | Phenylalanine metabolism                              | 229            | ko00360    |
| 66 | Alanine, aspartate and glutamate metabolism           | 225            | ko00250    |
| 67 | DNA replication                                       | 220            | ko03030    |
| 68 | Base excision repair                                  | 219            | ko03410    |
| 69 | Mismatch repair                                       | 218            | ko03430    |
| 70 | Nitrogen metabolism                                   | 206            | ko00910    |
| 71 | Protein export                                        | 199            | ko03060    |
| 72 | Phenylalanine, tyrosine and tryptophan biosynthesis   | 198            | ko00400    |
| 73 | Propanoate metabolism                                 | 196            | ko00640    |
| 74 | Photosynthesis                                        | 184            | ko00195    |
| 75 | Glyoxylate and dicarboxylate metabolism               | 178            | ko00630    |
| 76 | Citrate cycle (TCA cycle)                             | 175            | ko00020    |
| 77 | SNARE interactions in vesicular transport             | 175            | ko04130    |
| 78 | Pantothenate and CoA biosynthesis                     | 168            | ko00770    |
| 79 | Cutin, suberine and wax biosynthesis                  | 167            | ko00073    |
| 80 | Steroid biosynthesis                                  | 165            | ko00100    |
| 81 | Proteasome                                            | 161            | ko03050    |

**Table S1. Cont.**

| #   | Pathway                                                | Count (46,381) | Pathway ID |
|-----|--------------------------------------------------------|----------------|------------|
| 82  | Glycosphingolipid biosynthesis - ganglio series        | 159            | ko00604    |
| 83  | Tryptophan metabolism                                  | 159            | ko00380    |
| 84  | Ubiquinone and other terpenoid-quinone biosynthesis    | 146            | ko00130    |
| 85  | Butanoate metabolism                                   | 143            | ko00650    |
| 86  | Fatty acid biosynthesis                                | 141            | ko00061    |
| 87  | $\beta$ -Alanine metabolism                            | 141            | ko00410    |
| 88  | Lysine degradation                                     | 139            | ko00310    |
| 89  | Flavone and flavonol biosynthesis                      | 137            | ko00944    |
| 90  | Diterpenoid biosynthesis                               | 134            | ko00904    |
| 91  | Brassinosteroid biosynthesis                           | 122            | ko00905    |
| 92  | Lysine biosynthesis                                    | 113            | ko00300    |
| 93  | Linoleic acid metabolism                               | 110            | ko00591    |
| 94  | Valine, leucine and isoleucine biosynthesis            | 110            | ko00290    |
| 95  | Riboflavin metabolism                                  | 108            | ko00740    |
| 96  | Biosynthesis of unsaturated fatty acids                | 106            | ko01040    |
| 97  | Histidine metabolism                                   | 104            | ko00340    |
| 98  | Isoquinoline alkaloid biosynthesis                     | 100            | ko00950    |
| 99  | One carbon pool by folate                              | 97             | ko00670    |
| 100 | Nicotinate and nicotinamide metabolism                 | 95             | ko00760    |
| 101 | Fatty acid elongation                                  | 88             | ko00062    |
| 102 | Sulfur metabolism                                      | 84             | ko00920    |
| 103 | Tropane, piperidine and pyridine alkaloid biosynthesis | 82             | ko00960    |
| 104 | Folate biosynthesis                                    | 81             | ko00790    |
| 105 | Selenocompound metabolism                              | 78             | ko00450    |
| 106 | Circadian rhythm-mammal                                | 75             | ko04710    |
| 107 | Benzoxazinoid biosynthesis                             | 71             | ko00402    |
| 108 | Taurine and hypotaurine metabolism                     | 67             | ko00430    |
| 109 | Vitamin B6 metabolism                                  | 67             | ko00750    |
| 110 | Sesquiterpenoid and triterpenoid biosynthesis          | 63             | ko00909    |
| 111 | Monoterpenoid biosynthesis                             | 62             | ko00902    |
| 112 | Arachidonic acid metabolism                            | 59             | ko00590    |
| 113 | Glucosinolate biosynthesis                             | 56             | ko00966    |
| 114 | Thiamine metabolism                                    | 54             | ko00730    |
| 115 | Isoflavonoid biosynthesis                              | 53             | ko00943    |
| 116 | Photosynthesis-antenna proteins                        | 52             | ko00196    |
| 117 | Glycosphingolipid biosynthesis-globo series            | 50             | ko00603    |
| 118 | Sulfur relay system                                    | 46             | ko04122    |
| 119 | Non-homologous end-joining                             | 42             | ko03450    |

**Table S1. Cont.**

| #   | Pathway                                      | Count (46,381) | Pathway ID |
|-----|----------------------------------------------|----------------|------------|
| 120 | C5-Branched dibasic acid metabolism          | 39             | ko00660    |
| 121 | Other types of <i>O</i> -glycan biosynthesis | 39             | ko00514    |
| 122 | Indole alkaloid biosynthesis                 | 39             | ko00901    |
| 123 | Synthesis and degradation of ketone bodies   | 39             | ko00072    |
| 124 | Lipoic acid metabolism                       | 22             | ko00785    |
| 125 | Biotin metabolism                            | 22             | ko00780    |
| 126 | Anthocyanin biosynthesis                     | 7              | ko00942    |
| 127 | Caffeine metabolism                          | 2              | ko00232    |
| 128 | Betalain biosynthesis                        | 2              | ko00965    |

**Table S3.** KEGG pathway analysis results for the *P. fortunei* DEGs. Top 10 pathways are in Table 4.

| #  | Pathway                                       | DEGswith Pathway Annotation | <i>p</i> -Value | <i>Q</i> Value        | Pathway ID |
|----|-----------------------------------------------|-----------------------------|-----------------|-----------------------|------------|
| 11 | Flavonoid biosynthesis                        | 13 (2.43%)                  | 0.000294        | $2.21 \times 10^{-3}$ | ko00941    |
| 12 | Pentose and glucuronateinterconversions       | 15 (2.8%)                   | 0.000425        | $2.94 \times 10^{-3}$ | ko00040    |
| 13 | Zeatin biosynthesis                           | 11 (2.06%)                  | 0.000835        | $5.33 \times 10^{-3}$ | ko00908    |
| 14 | Flavone and flavonol biosynthesis             | 7 (1.31%)                   | 0.001108        | $6.57 \times 10^{-3}$ | ko00944    |
| 15 | Metabolic pathways                            | 147 (27.48%)                | 0.002526        | $1.40 \times 10^{-2}$ | ko01100    |
| 16 | Sulfur metabolism                             | 5 (0.93%)                   | 0.002929        | $1.52 \times 10^{-2}$ | ko00920    |
| 17 | Cutin, suberine and wax biosynthesis          | 7 (1.31%)                   | 0.0034          | $1.66 \times 10^{-2}$ | ko00073    |
| 18 | Glucosinolate biosynthesis                    | 4 (0.75%)                   | 0.004004        | $1.85 \times 10^{-2}$ | ko00966    |
| 19 | Cysteine and methionine metabolism            | 8 (1.5%)                    | 0.014881        | $6.50 \times 10^{-2}$ | ko00270    |
| 20 | Diterpenoid biosynthesis                      | 5 (0.93%)                   | 0.019914        | $8.26 \times 10^{-2}$ | ko00904    |
| 21 | Lysine biosynthesis                           | 4 (0.75%)                   | 0.042247        | $1.67 \times 10^{-1}$ | ko00300    |
| 22 | Phenylalanine metabolism                      | 6 (1.12%)                   | 0.050661        | $1.91 \times 10^{-1}$ | ko00360    |
| 23 | Inositol phosphate metabolism                 | 8 (1.5%)                    | 0.058159        | $2.10 \times 10^{-1}$ | ko00562    |
| 24 | Other glycan degradation                      | 8 (1.5%)                    | 0.061211        | $2.12 \times 10^{-1}$ | ko00511    |
| 25 | Valine, leucine and isoleucine degradation    | 7 (1.31%)                   | 0.072313        | $2.40 \times 10^{-1}$ | ko00280    |
| 26 | SNARE interactions in vesicular transport     | 4 (0.75%)                   | 0.144865        | $4.52 \times 10^{-1}$ | ko04130    |
| 27 | Phenylpropanoid biosynthesis                  | 11 (2.06%)                  | 0.146939        | $4.52 \times 10^{-1}$ | ko00940    |
| 28 | Brassinosteroid biosynthesis                  | 3 (0.56%)                   | 0.167226        | $4.82 \times 10^{-1}$ | ko00905    |
| 29 | Arginine and proline metabolism               | 6 (1.12%)                   | 0.168565        | $4.82 \times 10^{-1}$ | ko00330    |
| 30 | Galactose metabolism                          | 8 (1.5%)                    | 0.222831        | $6.08 \times 10^{-1}$ | ko00052    |
| 31 | Selenocompound metabolism                     | 2 (0.37%)                   | 0.227163        | $6.08 \times 10^{-1}$ | ko00450    |
| 32 | Starch and sucrose metabolism                 | 17 (3.18%)                  | 0.269985        | $7.00 \times 10^{-1}$ | ko00500    |
| 33 | Glycosphingolipid biosynthesis-ganglio series | 3 (0.56%)                   | 0.278167        | $7.00 \times 10^{-1}$ | ko00604    |
| 34 | Isoquinoline alkaloid biosynthesis            | 2 (0.37%)                   | 0.320879        | $7.83 \times 10^{-1}$ | ko00950    |
| 35 | Regulation of autophagy                       | 4 (0.75%)                   | 0.430279        | 1.00                  | ko04140    |
| 36 | Plant hormone signal transduction             | 29 (5.42%)                  | 0.44149         | 1.00                  | ko04075    |
| 37 | Mismatch repair                               | 3 (0.56%)                   | 0.460996        | 1.00                  | ko03430    |
| 38 | Ubiquitin mediated proteolysis                | 11 (2.06%)                  | 0.484156        | 1.00                  | ko04120    |

Table S3. *Cont.*

| #  | Pathway                                               | DEGs with Pathway Annotation | <i>p</i> -Value | <i>Q</i> Value | Pathway ID |
|----|-------------------------------------------------------|------------------------------|-----------------|----------------|------------|
| 39 | Fatty acid biosynthesis                               | 2 (0.37%)                    | 0.485025        | 1.00           | ko00061    |
| 40 | Sesquiterpenoid and triterpenoid biosynthesis         | 1 (0.19%)                    | 0.518772        | 1.00           | ko00909    |
| 41 | Phagosome                                             | 4 (0.75%)                    | 0.519833        | 1.00           | ko04145    |
| 42 | Glycosaminoglycan degradation                         | 3 (0.56%)                    | 0.527311        | 1.00           | ko00531    |
| 43 | Vitamin B6 metabolism                                 | 1 (0.19%)                    | 0.540624        | 1.00           | ko00750    |
| 44 | Fructose and mannose metabolism                       | 3 (0.56%)                    | 0.543859        | 1.00           | ko00051    |
| 45 | Spliceosome                                           | 20 (3.74%)                   | 0.552954        | 1.00           | ko03040    |
| 46 | Benzoxazinoid biosynthesis                            | 1 (0.19%)                    | 0.561486        | 1.00           | ko00402    |
| 47 | Glyoxylate and dicarboxylate metabolism               | 2 (0.37%)                    | 0.610346        | 1.00           | ko00630    |
| 48 | Phosphatidylinositol signaling system                 | 5 (0.93%)                    | 0.636256        | 1.00           | ko04070    |
| 49 | Sphingolipid metabolism                               | 3 (0.56%)                    | 0.647326        | 1.00           | ko00600    |
| 50 | Glycosylphosphatidylinositol(GPI)-anchor biosynthesis | 3 (0.56%)                    | 0.685028        | 1.00           | ko00563    |
| 51 | Histidine metabolism                                  | 1 (0.19%)                    | 0.701191        | 1.00           | ko00340    |
| 52 | Alanine, aspartate and glutamate metabolism           | 2 (0.37%)                    | 0.734255        | 1.00           | ko00250    |
| 53 | Tyrosine metabolism                                   | 2 (0.37%)                    | 0.759972        | 1.00           | ko00350    |
| 54 | Lysine degradation                                    | 1 (0.19%)                    | 0.801127        | 1.00           | ko00310    |
| 55 | Glycine, serine and threonine metabolism              | 2 (0.37%)                    | 0.811724        | 1.00           | ko00260    |
| 56 | Ether lipid metabolism                                | 9 (1.68%)                    | 0.813014        | 1.00           | ko00565    |
| 57 | ABC transporters                                      | 5 (0.93%)                    | 0.824141        | 1.00           | ko02010    |
| 58 | Natural killer cell mediated cytotoxicity             | 2 (0.37%)                    | 0.832185        | 1.00           | ko04650    |
| 59 | Pentose phosphate pathway                             | 2 (0.37%)                    | 0.842353        | 1.00           | ko00030    |
| 60 | Terpenoid backbone biosynthesis                       | 2 (0.37%)                    | 0.867194        | 1.00           | ko00900    |
| 61 | Oxidative phosphorylation                             | 3 (0.56%)                    | 0.868532        | 1.00           | ko00190    |
| 62 | Citrate cycle (TCA cycle)                             | 1 (0.19%)                    | 0.869212        | 1.00           | ko00020    |
| 63 | Plant-pathogen interaction                            | 26 (4.86%)                   | 0.869223        | 1.00           | ko04626    |
| 64 | Pyrimidine metabolism                                 | 6 (1.12%)                    | 0.881902        | 1.00           | ko00240    |
| 65 | Photosynthesis                                        | 1 (0.19%)                    | 0.882228        | 1.00           | ko00195    |
| 66 | Endocytosis                                           | 11 (2.06%)                   | 0.902846        | 1.00           | ko04144    |
| 67 | Nitrogen metabolism                                   | 1 (0.19%)                    | 0.908857        | 1.00           | ko00910    |
| 68 | Homologous recombination                              | 2 (0.37%)                    | 0.911529        | 1.00           | ko03440    |
| 69 | Base excision repair                                  | 1 (0.19%)                    | 0.921672        | 1.00           | ko03410    |
| 70 | DNA replication                                       | 1 (0.19%)                    | 0.92258         | 1.00           | ko03030    |
| 71 | RNA polymerase                                        | 2 (0.37%)                    | 0.935848        | 1.00           | ko03020    |
| 72 | Amino sugar and nucleotide sugar metabolism           | 3 (0.56%)                    | 0.938431        | 1.00           | ko00520    |
| 73 | Glycerophospholipid metabolism                        | 10 (1.87%)                   | 0.963808        | 1.00           | ko00564    |
| 74 | Purine metabolism                                     | 5 (0.93%)                    | 0.97865         | 1.00           | ko00230    |
| 75 | Nucleotide excision repair                            | 1 (0.19%)                    | 0.984542        | 1.00           | ko03420    |
| 76 | Basal transcription factors                           | 1 (0.19%)                    | 0.98559         | 1.00           | ko03022    |
| 77 | Ribosome biogenesis in eukaryotes                     | 3 (0.56%)                    | 0.988163        | 1.00           | ko03008    |
| 78 | Aminoacyl-tRNA biosynthesis                           | 1 (0.19%)                    | 0.988461        | 1.00           | ko00970    |

**Table S3. Cont.**

| #  | Pathway                                     | DEGs with Pathway<br>Annotation | <i>p</i> -Value | <i>Q</i> Value | Pathway ID |
|----|---------------------------------------------|---------------------------------|-----------------|----------------|------------|
| 79 | RNA transport                               | 9 (1.68%)                       | 0.993872        | 1.00           | ko03013    |
| 80 | Glycolysis/Gluconeogenesis                  | 1 (0.19%)                       | 0.997655        | 1.00           | ko00010    |
| 81 | Ribosome                                    | 2 (0.37%)                       | 0.998349        | 1.00           | ko03010    |
| 82 | mRNA surveillance pathway                   | 3 (0.56%)                       | 0.999043        | 1.00           | ko03015    |
| 83 | Protein processing in endoplasmic reticulum | 4 (0.75%)                       | 0.999893        | 1.00           | ko04141    |

**Table S4.** Primers of quantitative RT-PCR analysis of candidate defence genes. -r represents reverse primers.

| Potential Gene Function                        | Gene Name      | Size (bp) | Up/Down * | Primer                                       | Sequence                                           |
|------------------------------------------------|----------------|-----------|-----------|----------------------------------------------|----------------------------------------------------|
| WRKY protein                                   | <i>WRKY29</i>  | 1081      | Up        | CL3202.Contig3_All<br>CL3202.Contig3_All-r   | TGAGGAACAACCACTTTAGC<br>GCAGAACACAGCCATAGC         |
| histidine kinase                               | <i>CRE1</i>    | 1848      | Up        | Unigene12008_All<br>Unigene12008_All-r       | GAGGGTATATTGGAAGCATTGTC<br>CAGGATAAGCATAAGCAGTAAGG |
| histidine-containing phosphor transfer protein | <i>AHP</i>     | 915       | Down      | CL8962.Contig1_All<br>CL8962.Contig1_All-r   | GCACACAATTTCAAGAATACTG<br>ACGACAATAAAGCAACGATTAG   |
| abscisic acid receptor                         | <i>PYL</i>     | 533       | Up        | CL12775.Contig1_All<br>CL12775.Contig1_All-r | AGTGTAATATGTGCTTGTAACC<br>CCTATTAAGTCTGTGAAGTATCG  |
| ABA responsive element binding factor          | <i>ABF</i>     | 818       | Up        | CL2960.Contig1_All<br>CL2960.Contig1_All-r   | GGTCCTCAAGTTCTCCAAGTG<br>GCGTAGGCGTATGGTATCG       |
| Adenylate isopentenyl transferase              | <i>IPT</i>     | 1130      | Up        | Unigene27866_All<br>Unigene27866_All-r       | AAGGTTACTGATGAGGAATG<br>CCAGCAATGATAGGAAGC         |
| cytokinin trans-hydroxylase                    | <i>CYP735A</i> | 1848      | Down      | CL4119.Contig2_All<br>CL4119.Contig2_All-r   | GGAATACATCAGTTACGAAGG<br>TTTGGAGGGTGAAGAATGG       |
| serine/threonine-protein kinase                | <i>PBS1</i>    | 1644      | Down      | CL2490.Contig6_All<br>CL2490.Contig6_All-r   | CCGAACTCTTGGACAACC<br>AACAACTGCGAATGATGATG         |
| circadian clock associated 1                   | <i>CCA1</i>    | 2362      | Up        | CL4203.Contig5_All<br>CL4203.Contig5_All-r   | GTCAGGCAGAGAAGATATG<br>GGAACAGGAGAACCAATC          |
| GIGANTEA                                       | <i>GI</i>      | 4520      | Down      | Unigene30581_All<br>Unigene30581_All-r       | CCAGCACCATTAGCAACAG<br>TACTCGCAGCACCTCTTG          |
| plasma intrinsic protein 2                     |                | 611       | Up        | Unigene10760_All<br>Unigene10760_All-r       | ATTGGATTTGCTGTGTTC<br>CCTTAGGATGAATTGATGG          |
| plasma membrane H <sup>+</sup> -ATPase LilHA2  |                | 413       | Up        | Unigene14837_All<br>Unigene14837_All-r       | AGACCATCCAGCAGCATTAC<br>GCTCTTTCTTGCCTCATTCC       |

\* Up or down regulation indicated the expression in the PFI vs. PF comparison. In the PFI-60 vs. PFI comparison, the tendencies were opposite.



**Table S5.** Parameters and versions of softwares and databases in this study.

| Software      | Version           | Parameters                                                                              | Database   | Version                   |
|---------------|-------------------|-----------------------------------------------------------------------------------------|------------|---------------------------|
| filter_fq     | in house          | –                                                                                       | –          | –                         |
| Trinity       | release-20121005  | --seqType fq --min_contig_length 100;<br>--group_pairs_distance 250<br>--min_kmer_cov 2 | –          | –                         |
| TGICL         | v2.1              | -l 40 -c 10 -v 20                                                                       | –          | –                         |
| Phrap         | Release 23.0      | -repeat_stringency 0.95 -minmatch 35;<br>-minscore 35                                   | –          | –                         |
| BLAST         | v2.2.26+x64-linux | -F F -e 1e-5 -p blastn;<br>-F F -e 1e-5 -p blastx                                       | nt         | release-20121005          |
|               |                   |                                                                                         | nr         | release-20121005          |
|               |                   |                                                                                         | KEGG       | release 63.0              |
|               |                   |                                                                                         | Swiss-Prot | release-2012_08           |
|               |                   |                                                                                         | COG        | release-20090331          |
| Blast2GO      | v2.5.0            | Default                                                                                 | GO         | release<br>2012-10-01     |
| Path_finder   | in house          | –                                                                                       | KEGG       | release 63.0              |
| ESTScan       | v3.0.2            | –                                                                                       | –          | –                         |
| fpkm          | in house          | –                                                                                       | –          | –                         |
| SOAP          | Release 2.21      | -m 0 -x 500 -s 40 -l 35 -v 5 -r 1                                                       | –          | –                         |
| GO-TermFinder | v0.86             | –                                                                                       | GO         | release<br>1 October 2012 |
